# Supplementary material for: C57BL/6 Background Attenuates mHTT Toxicity in the Striatum of YAC128 Mice
Source: MDPI journal article supplement (doi:10.3390/ijms222312664), 2021-11-23
Supplement: s1 [file s1]

## Supplemental Figure S2: Behavior is impaired in 9-month-old female and male YAC128/BL6 mice

a

### Open Field test

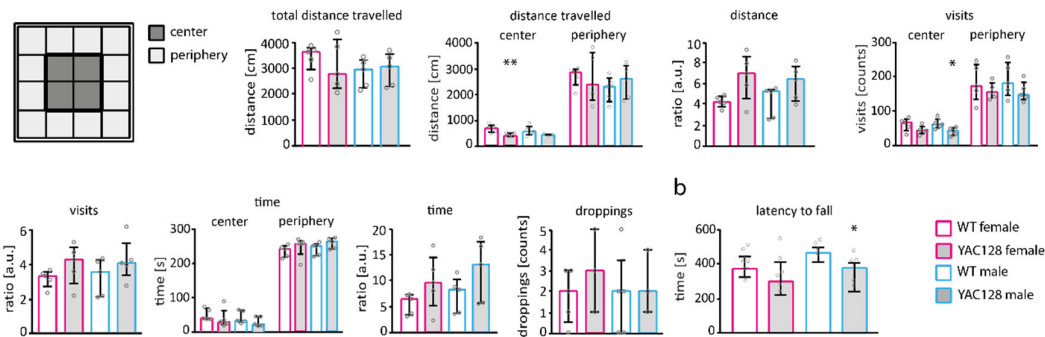

b

c

### Body weight

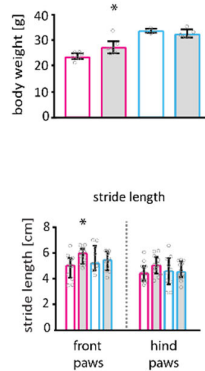

d

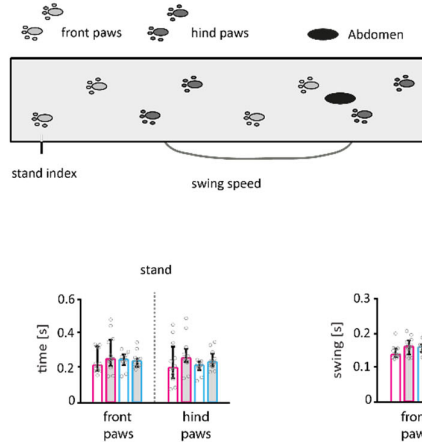

e

### Gait analysis

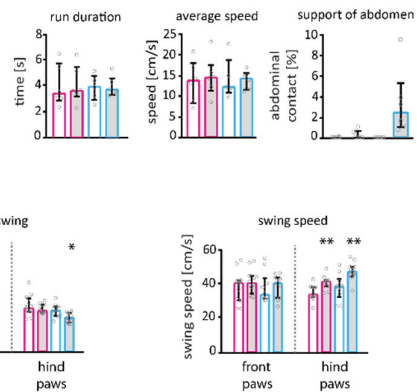

Data of Figure 6 separated by sex. (a—left) Scheme of the Open Field divisions with center and periphery. (a—right) Bar graphs of Open Field behavioral parameters of WT (female n = 5; male = 5) and YAC128/BL6 (female n = 5; male n = 6) mice. (b) Bar graph of the latency to fall off the Rotarod for male and female WT (n females = 7; males = 6) and YAC128/BL6 (n females = 4, males = 5) mice. (c) Bar graph of the median body weight of female and male of WT and YAC128/BL6 mice. (d) Scheme of the gait analysis (Catwalk) setup. (e) Bar graphs of gait analysis parameters from WT (female n = 5; male = 5) and YAC128/BL6 (female n = 5; male n = 6) mice. Bar graphs are depicted as median  $\pm$  IQR. \* =  $p < 0.05$ , \*\* =  $p < 0.01$
