# Supplementary material for: C57BL/6 Background Attenuates mHTT Toxicity in the Striatum of YAC128 Mice
Source: MDPI journal article supplement (doi:10.3390/ijms222312664), 2021-11-23
Supplement: s1 [file s1]

**Supplemental Figure S1: Functional synapses are not impaired in 3-month-old and 18-month-old YAC128/BL6 mice**

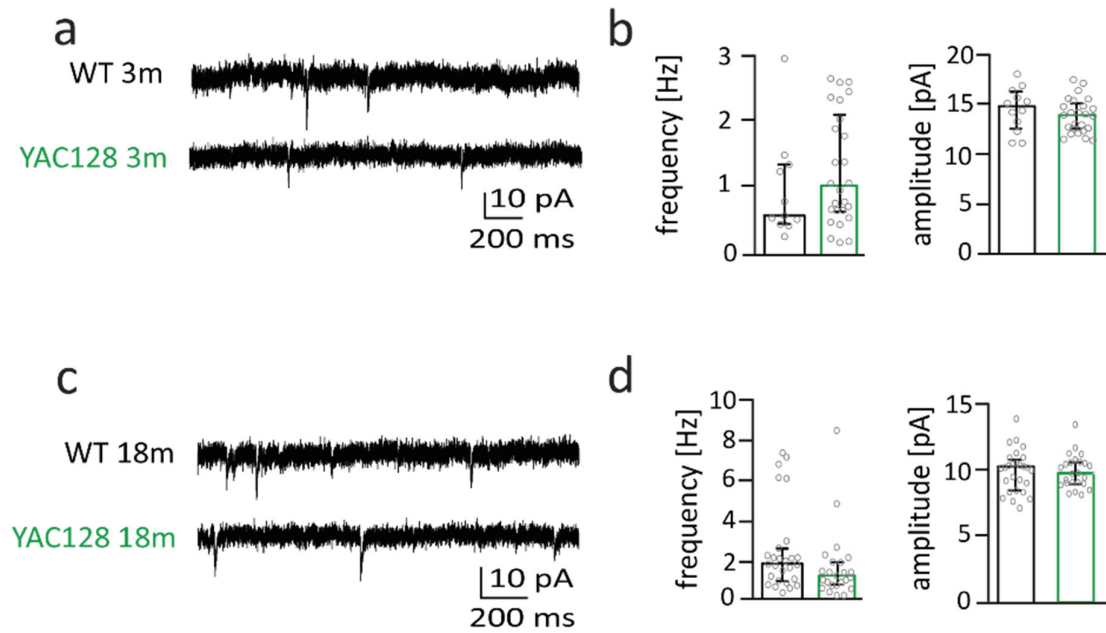

(a) Sample traces of mEPSC recordings from MSNs of 3-month-old WT and YAC128/BL6 mice. (b) Bar graphs of mEPSC frequency and peak amplitudes of MSNs from 3-month-old WT (n=12) and YAC128/BL6 (n=25) mice. (c) Sample traces of mEPSC recordings from MSNs of 18-month-old WT and YAC128/BL6 mice. (d) Bar graphs of mEPSC frequency and peak amplitudes of MSNs from 18-month-old WT (n=27) and YAC128/BL6 (n=24) mice. Bar graphs depict median  $\pm$  IQR.
